# Supplementary material for: A high-output flexible triboelectric nanogenerator based on polydimethylsiloxane/three-dimensional bilayer graphene/carbon cloth composites
Source: Royal Society of Chemistry journal article supplement (doi:10.1039/d0ta04341a), 2020-01-01
Supplement: d0ta04341a1.pdf [file d0ta04341a1.pdf]

## Electronic Supplementary Information

### **A high-output flexible triboelectric nanogenerator based on polydimethylsiloxane/three-dimensional bilayer graphene/carbon cloth composites**

Yongteng Qian,<sup>a</sup> Minkyun Sohn,<sup>a</sup> Wen He,<sup>a</sup> Hyunje Park,<sup>a</sup> K. R. V. Subramanian,<sup>b</sup> and Dae Joon Kang<sup>\*,a</sup>

<sup>a</sup>Department of Physics and Interdisciplinary Course of Physics and Chemistry, Sungkyunkwan University, 2066, Seobu-ro, Jangan-gu, Suwon-si, Gyeonggi-do 16419, Republic of Korea

<sup>b</sup>Department of Mechanical Engineering, Ramaiah Institute of Technology, MSR Nagar, MSRIT Post, Bangalore 560054, India

\*Author to whom correspondence should be addressed: [djkang@skku.edu](mailto:djkang@skku.edu) (Tel.: +82-31-290-5906)

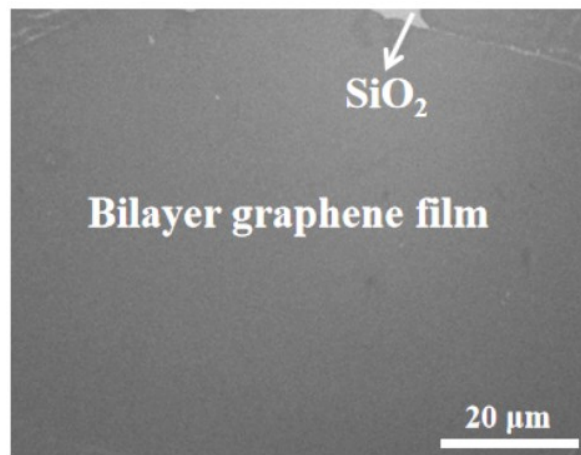

**Figure S1.** SEM image of BLG film on SiO<sub>2</sub> substrate

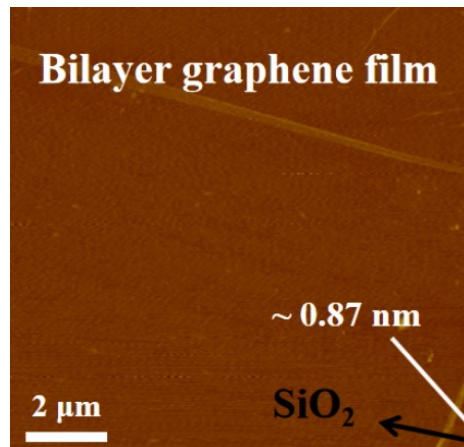

**Figure S2.** AFM image of BLG film on  $\text{SiO}_2$  substrate

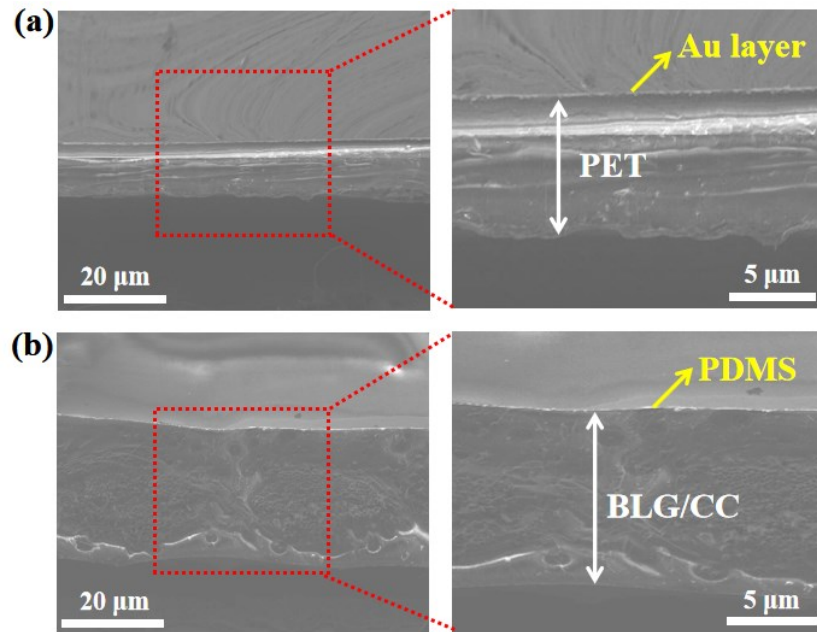

**Figure S3.** Cross-sectional SEM images of (a) top and (b) bottom electrodes of FTENG

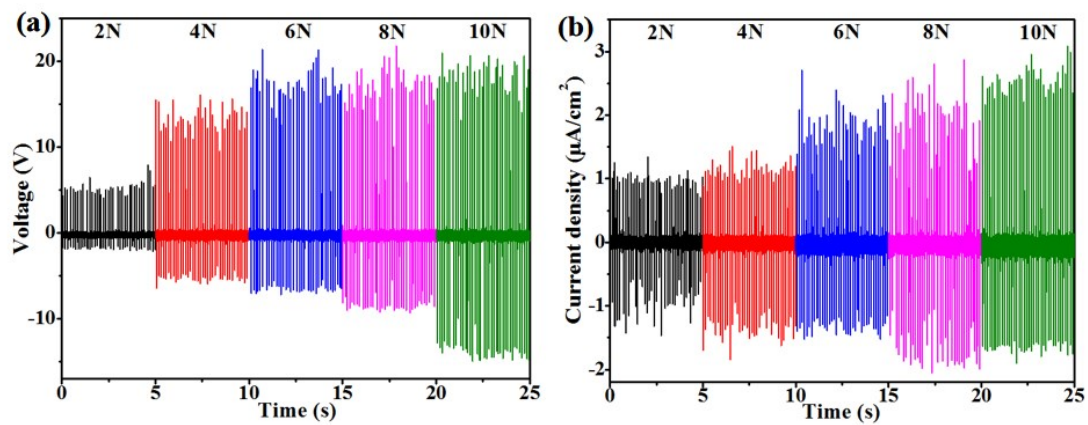

**Figure S4.** (a) The output voltage and (b) current density of PDMS/CC-based FTENG at driving frequency of 3 Hz under various compressive forces

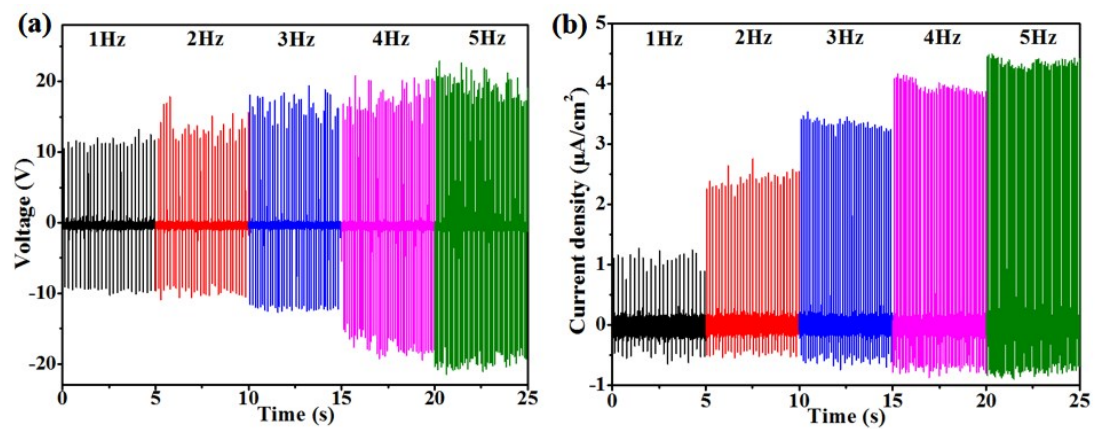

**Figure S5.** (a) The output voltage and (b) current density of PDMS/CC-based FTENG under driving compressive force of 6 N at various frequencies

**Table S1.** Output performance of FTENG under different vertical forces

---

| <b>PDMS/3D BLG/CC-based FTENG (1.0 cm×1.0 cm)</b>                             |                    |                                           |            |                                       |
|-------------------------------------------------------------------------------|--------------------|-------------------------------------------|------------|---------------------------------------|
| Vertical force was varied (2, 4, 6, 8 and 10 N) at the same frequency (3 Hz). |                    |                                           |            |                                       |
| Force (N)                                                                     | Output voltage (V) | Current density ( $\mu\text{A cm}^{-2}$ ) | Power (mW) | Power density ( $\text{mW cm}^{-2}$ ) |
| 2                                                                             | 13.5               | 3                                         | 0.041      | 0.041                                 |
| 4                                                                             | 18                 | 4.3                                       | 0.077      | 0.077                                 |
| 6                                                                             | 40                 | 6.3                                       | 0.252      | 0.252                                 |
| 8                                                                             | 49                 | 7.8                                       | 0.382      | 0.382                                 |
| 10                                                                            | 57                 | 8.6                                       | 0.490      | 0.490                                 |

  

| <b>PDMS/CC-based FTENG (1.0 cm × 1.0 cm)</b>                                  |                    |                                           |            |                                       |
|-------------------------------------------------------------------------------|--------------------|-------------------------------------------|------------|---------------------------------------|
| Vertical force was varied (2, 4, 6, 8 and 10 N) at the same frequency (3 Hz). |                    |                                           |            |                                       |
| Force (N)                                                                     | Output voltage (V) | Current density ( $\mu\text{A cm}^{-2}$ ) | Power (mW) | Power density ( $\text{mW cm}^{-2}$ ) |
| 2                                                                             | 10.1               | 1.82                                      | 0.018      | 0.018                                 |
| 4                                                                             | 15.2               | 2.5                                       | 0.058      | 0.058                                 |
| 6                                                                             | 24.5               | 3.1                                       | 0.076      | 0.076                                 |
| 8                                                                             | 26.3               | 3.8                                       | 0.099      | 0.099                                 |
| 10                                                                            | 33.5               | 4.2                                       | 0.140      | 0.140                                 |

---

**Table S2.** Output performance of FTENG at different vertical frequencies

---

**PDMS/3D BLG/CC-based FTENG (1.0 cm×1.0 cm)**  
Driving frequency was varied (1, 2, 3, 4, and 5 Hz) under the same vertical force (6 N).

| Frequency (Hz) | Output voltage (V) | Current density ( $\mu\text{A cm}^{-2}$ ) | Power (mW) | Power density ( $\text{mW cm}^{-2}$ ) |
|----------------|--------------------|-------------------------------------------|------------|---------------------------------------|
| 1              | 38                 | 3.7                                       | 0.141      | 0.141                                 |
| 2              | 48.5               | 4.5                                       | 0.218      | 0.218                                 |
| 3              | 53                 | 6.3                                       | 0.334      | 0.334                                 |
| 4              | 61                 | 7.8                                       | 0.476      | 0.476                                 |
| 5              | 70                 | 9.3                                       | 0.651      | 0.651                                 |

**PDMS/CC-based FTENG (1.0 cm × 1.0 cm)**  
Driving frequency was varied (1, 2, 3, 4, and 5 Hz) under the same vertical force (6 N).

| Frequency (Hz) | Output voltage (V) | Current density ( $\mu\text{A cm}^{-2}$ ) | Power (mW) | Power density ( $\text{mW cm}^{-2}$ ) |
|----------------|--------------------|-------------------------------------------|------------|---------------------------------------|
| 1              | 20                 | 1.6                                       | 0.032      | 0.032                                 |
| 2              | 21.9               | 2.8                                       | 0.061      | 0.061                                 |
| 3              | 29                 | 3.9                                       | 0.113      | 0.113                                 |
| 4              | 35.5               | 4.6                                       | 0.163      | 0.163                                 |
| 5              | 39                 | 5.1                                       | 0.199      | 0.199                                 |

---
